# Supplementary material for: Lipase-Catalyzed Synthesis, Antioxidant Activity, Antimicrobial Properties and Molecular Docking Studies of Butyl Dihydrocaffeate
Source: MDPI journal article supplement (doi:10.3390/molecules27155024), 2022-08-07

|    | Parameter              | Value               |
|----|------------------------|---------------------|
| 1  | Comment                | 33270-1H<br>BDHCA   |
| 2  | Origin                 | Bruker BioSpin GmbH |
| 3  | Owner                  | nmr                 |
| 4  | Spectrometer           | spect               |
| 5  | Solvent                | CDCl3               |
| 6  | Temperature            | 298.1               |
| 7  | Pulse Sequence         | zg30                |
| 8  | Number of Scans        | 40                  |
| 9  | Receiver Gain          | 200                 |
| 10 | Relaxation Delay       | 0.0000              |
| 11 | Pulse Width            | 14.5000             |
| 12 | Acquisition Time       | 3.5001              |
| 13 | Acquisition Date       | 2021-02-11T15:26:52 |
| 14 | Modification Date      | 2021-02-11T15:27:53 |
| 15 | Spectrometer Frequency | 300.20              |
| 16 | Spectral Width         | 6009.6              |
| 17 | Lowest Frequency       | -1158.2             |
| 18 | Nucleus                | 1H                  |
| 19 | Acquired Size          | 21034               |
| 20 | Spectral Size          | 65536               |

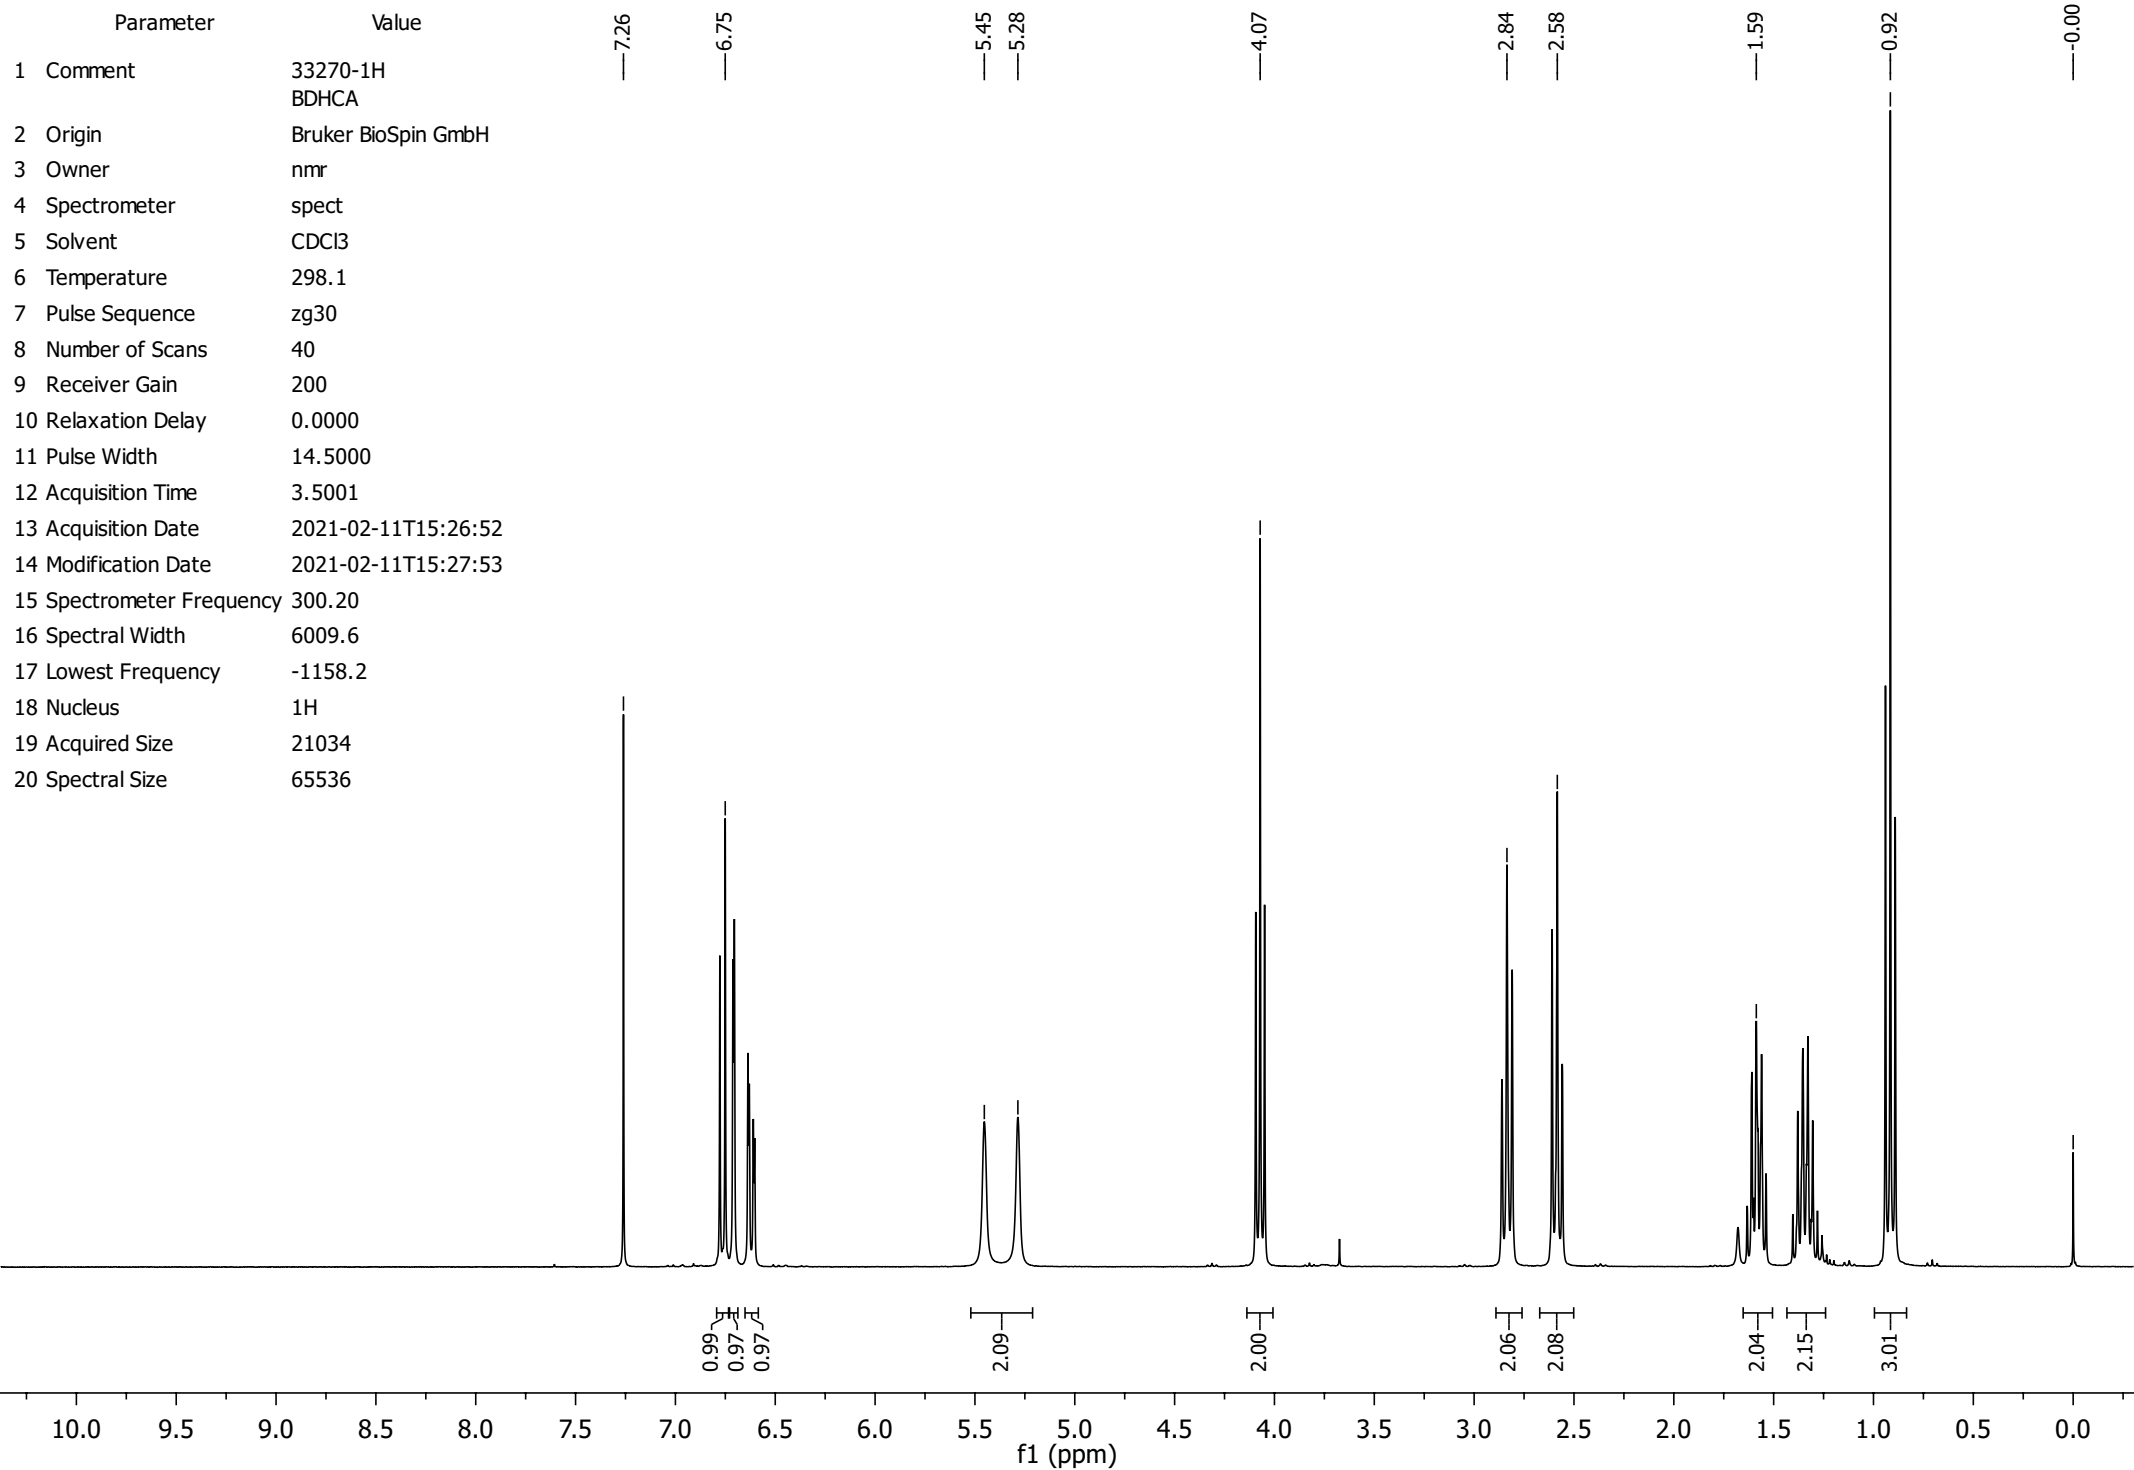

Supplement: s1 [file s1]
