# Supplementary material for: Lipase-Catalyzed Synthesis, Antioxidant Activity, Antimicrobial Properties and Molecular Docking Studies of Butyl Dihydrocaffeate
Source: MDPI journal article supplement (doi:10.3390/molecules27155024), 2022-08-07

| Parameter              | Value               |
|------------------------|---------------------|
| Comment                | 42094-13C<br>B1     |
| Origin                 | Bruker BioSpin GmbH |
| Solvent                | CDCl3               |
| Temperature            | 298.2               |
| Pulse Sequence         | zgpg30              |
| Number of Scans        | 1333                |
| Receiver Gain          | 200                 |
| Relaxation Delay       | 1.5000              |
| Pulse Width            | 10.0000             |
| Acquisition Time       | 1.7302              |
| Acquisition Date       | 2022-08-03T13:33:17 |
| Spectrometer Frequency | 75.49               |
| Spectral Width         | 18939.4             |
| Lowest Frequency       | -791.2              |
| Nucleus                | 13C                 |
| Acquired Size          | 32768               |
| Spectral Size          | 65536               |

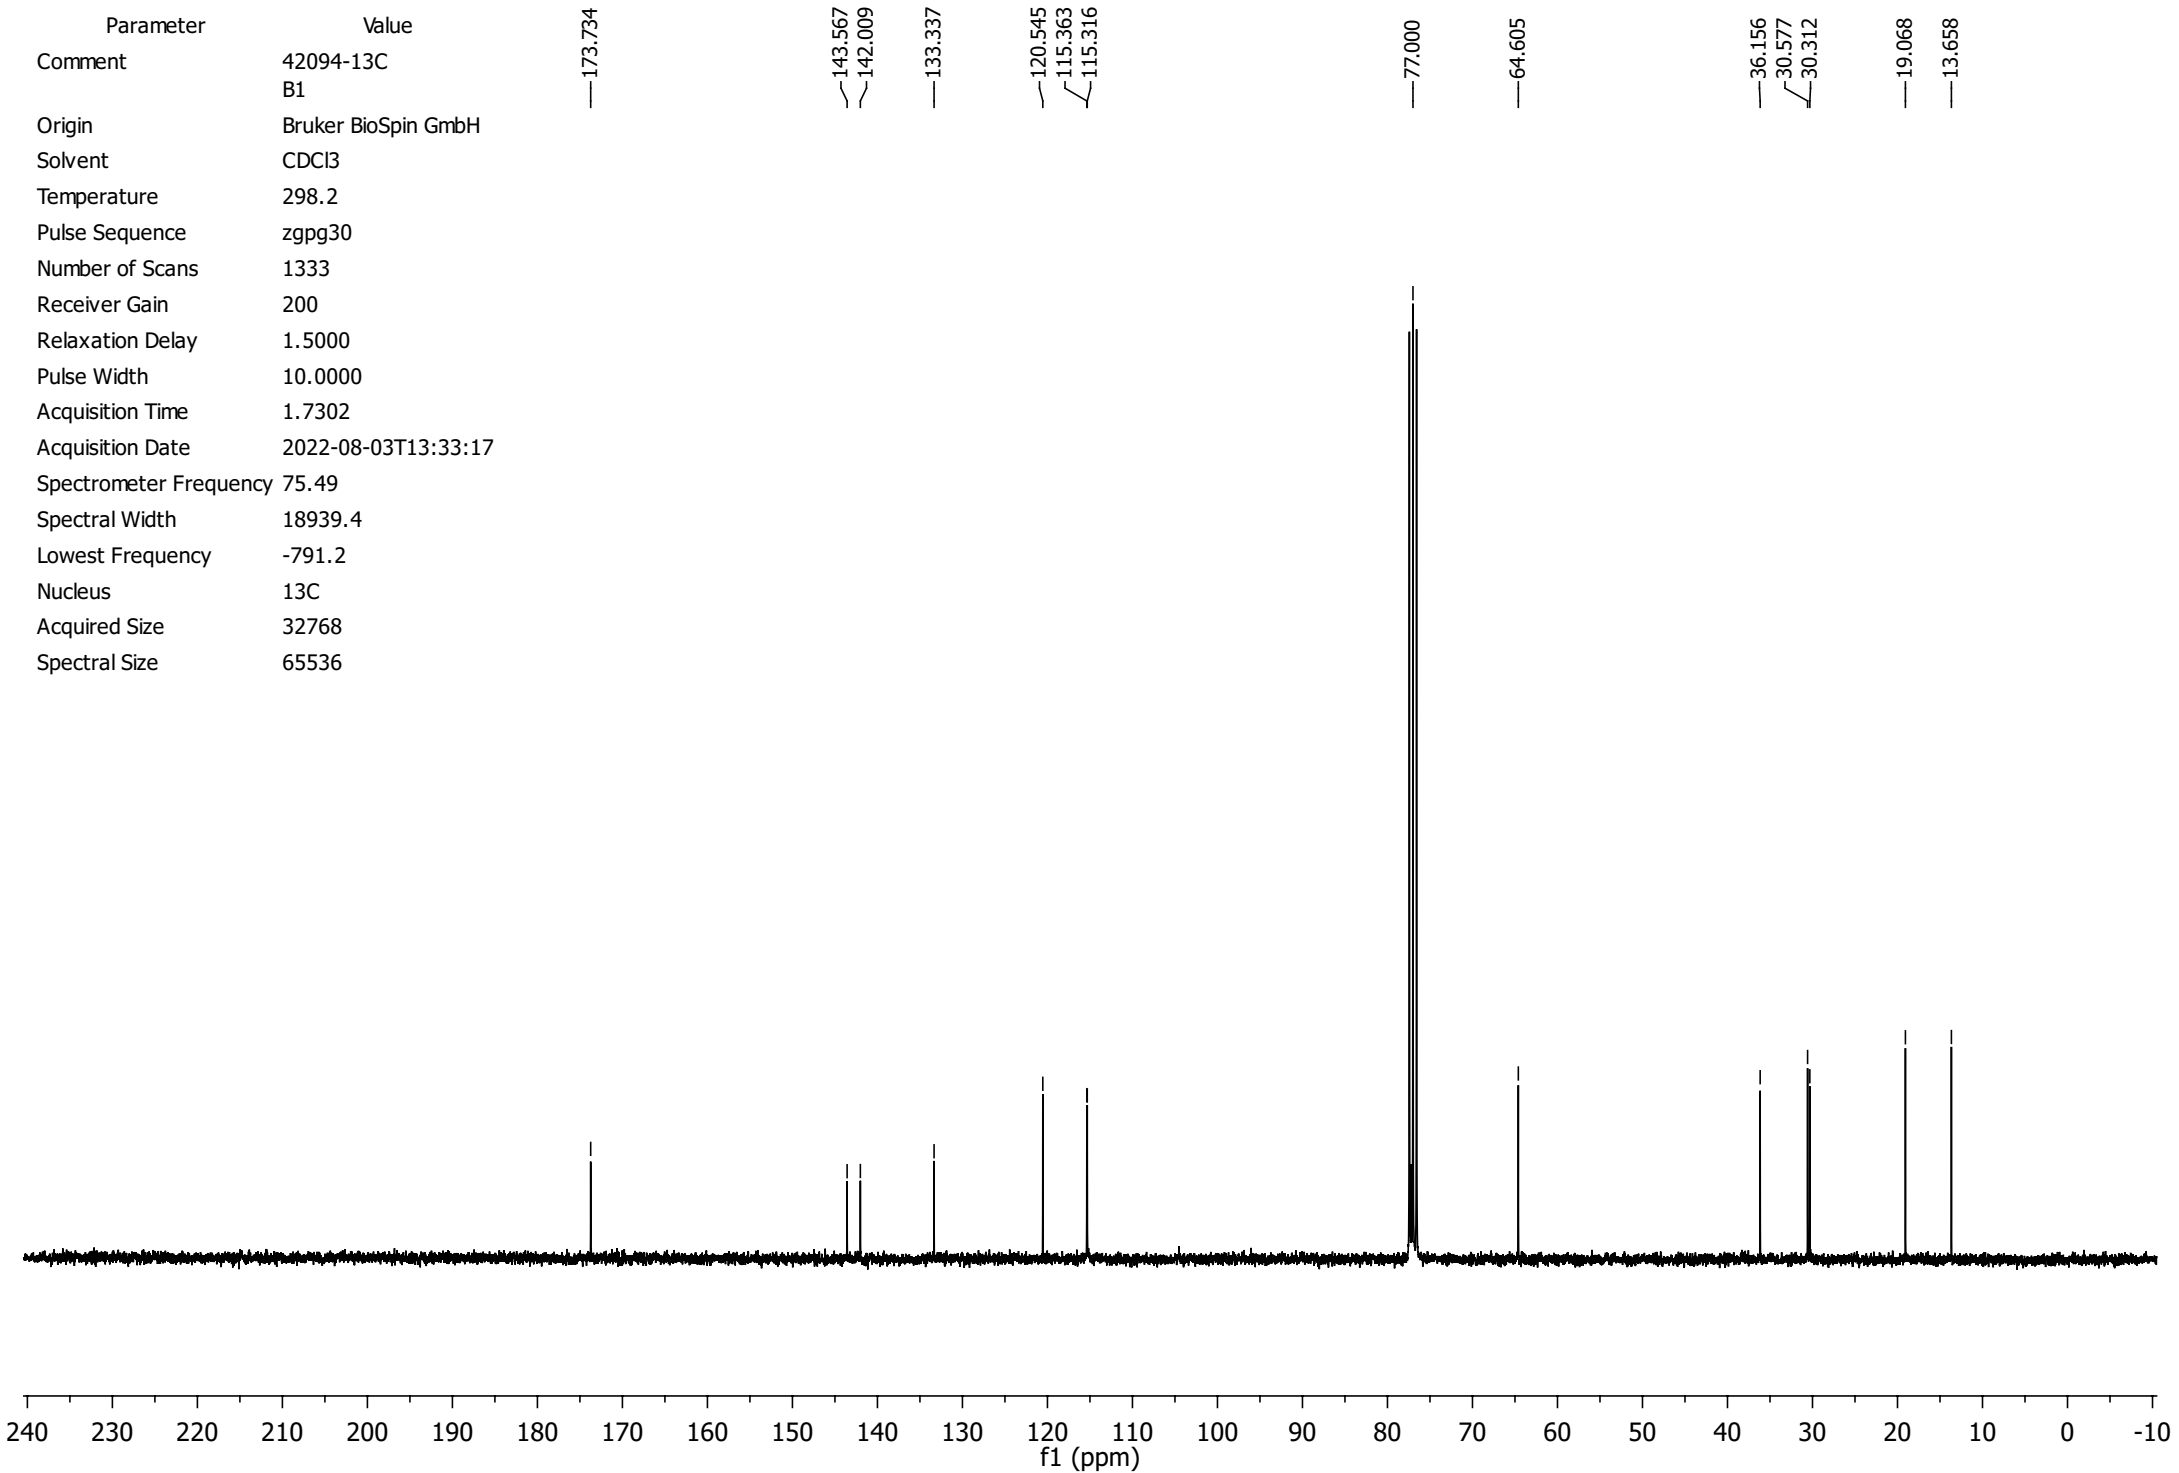

Supplement: s1 [file s1]
