# Supplementary figures and images for: Lipase-Catalyzed Synthesis, Antioxidant Activity, Antimicrobial Properties and Molecular Docking Studies of Butyl Dihydrocaffeate
Source: MDPI journal article supplement (doi:10.3390/molecules27155024), 2022-08-07

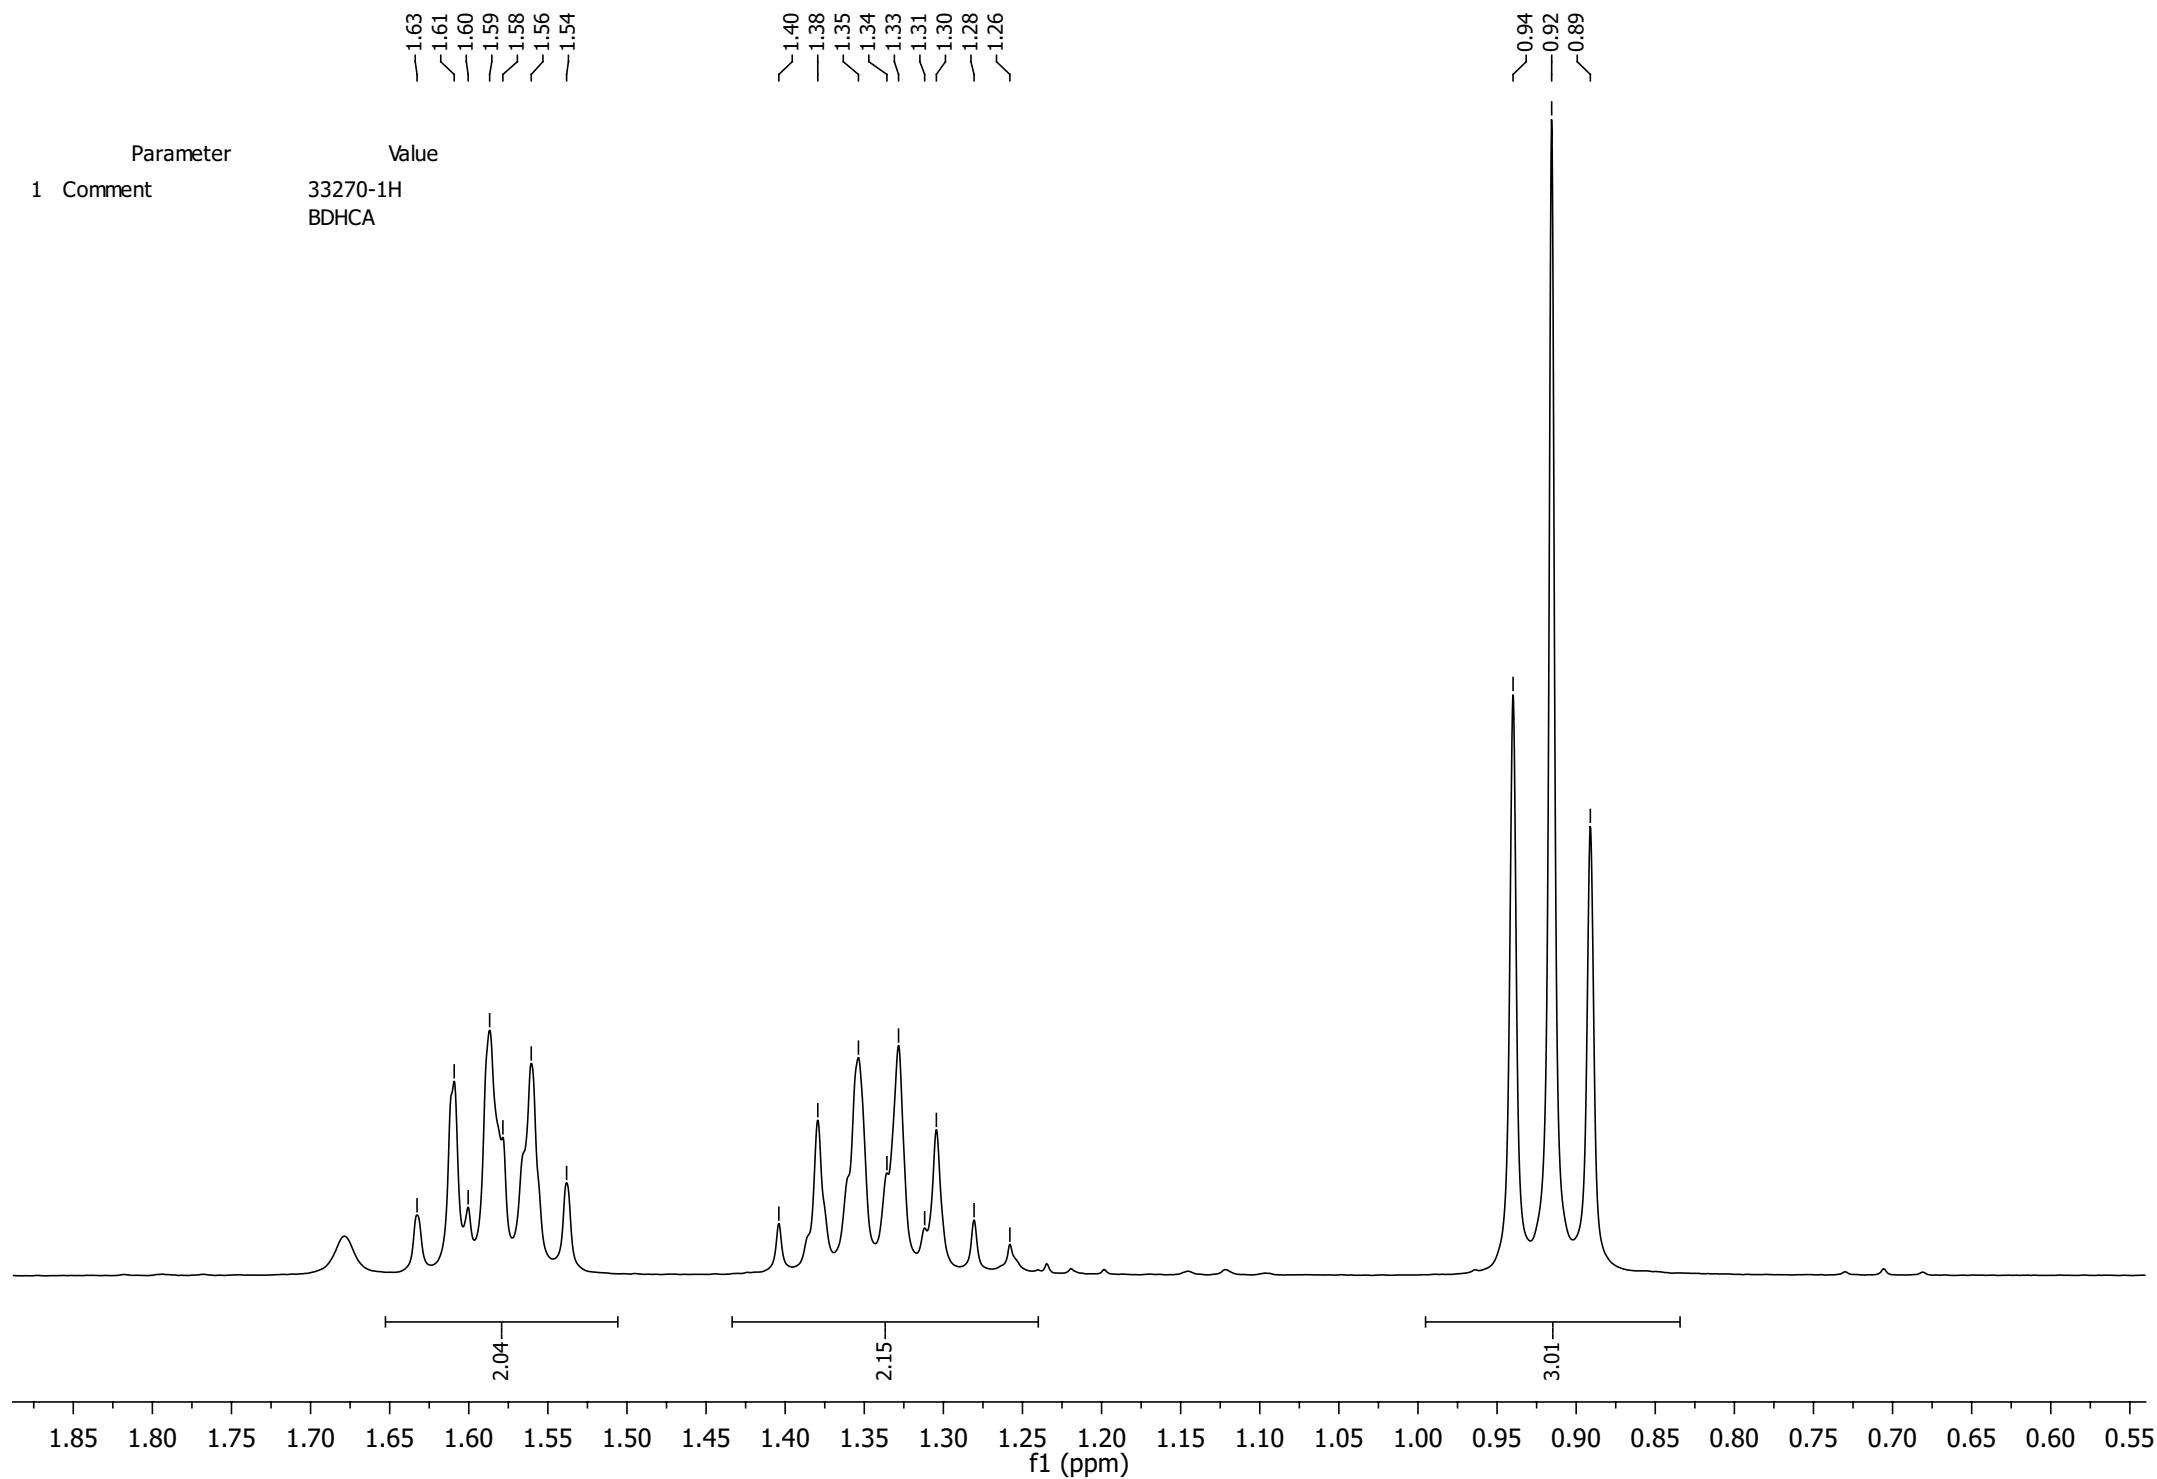

Supplement: s1 [file s1]

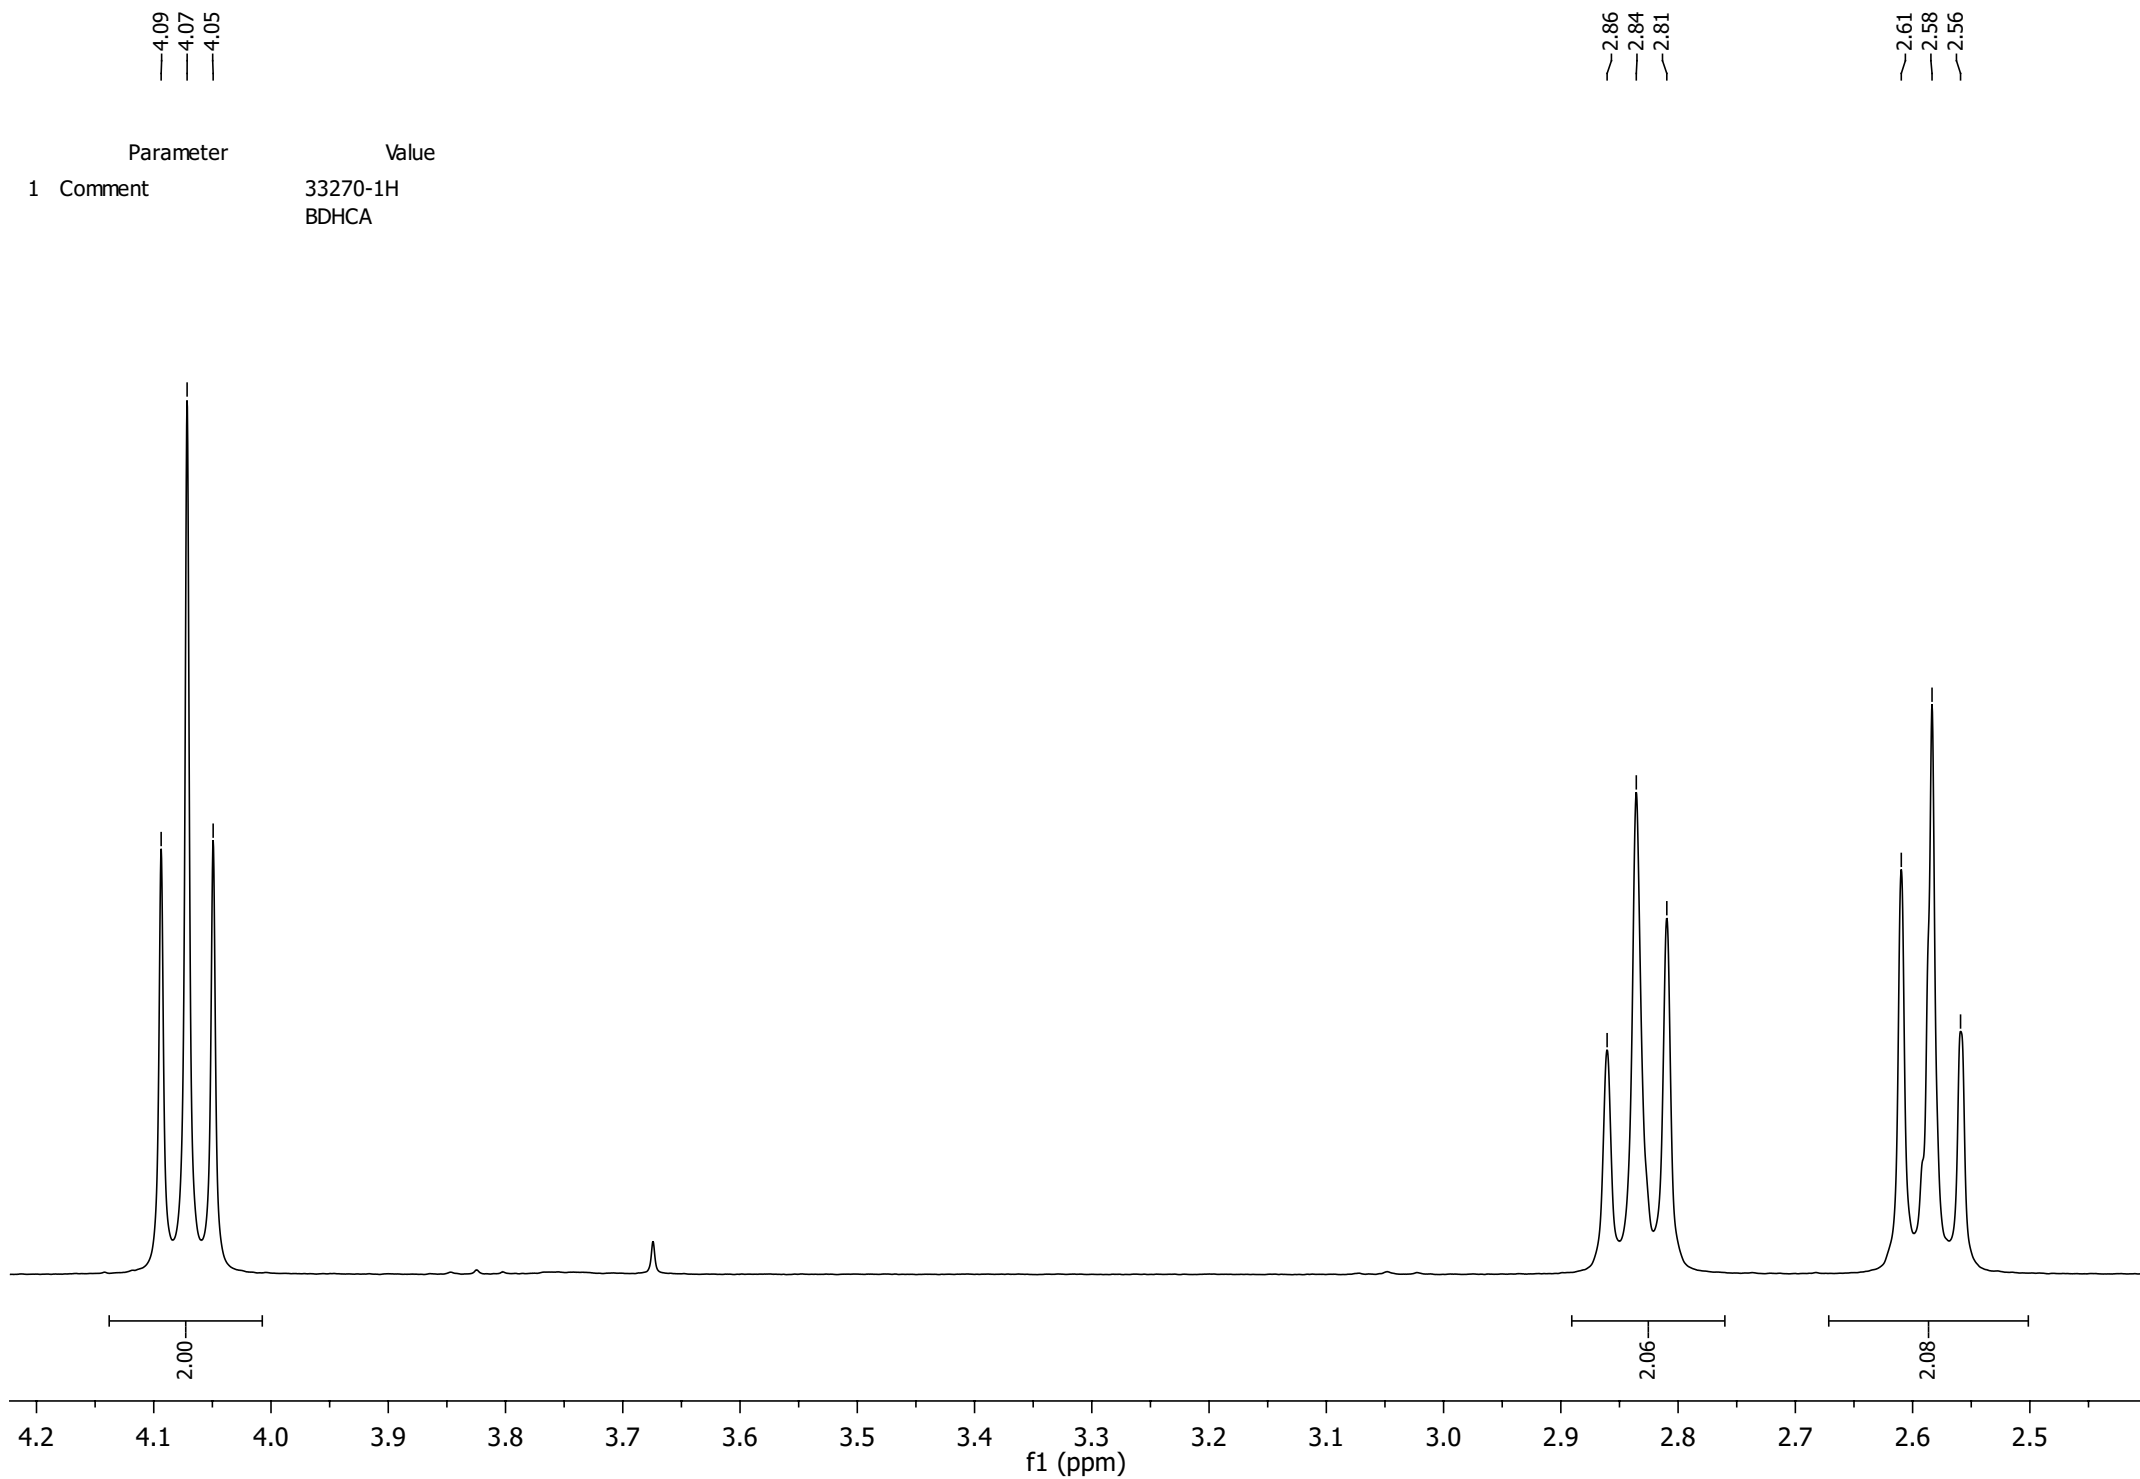

Supplement: s1 [file s1]

6.78  
6.75  
6.71  
6.70

6.64  
6.63  
6.61  
6.60

5.45

5.28

| Parameter | Value             |
|-----------|-------------------|
| 1 Comment | 33270-1H<br>BDHCA |

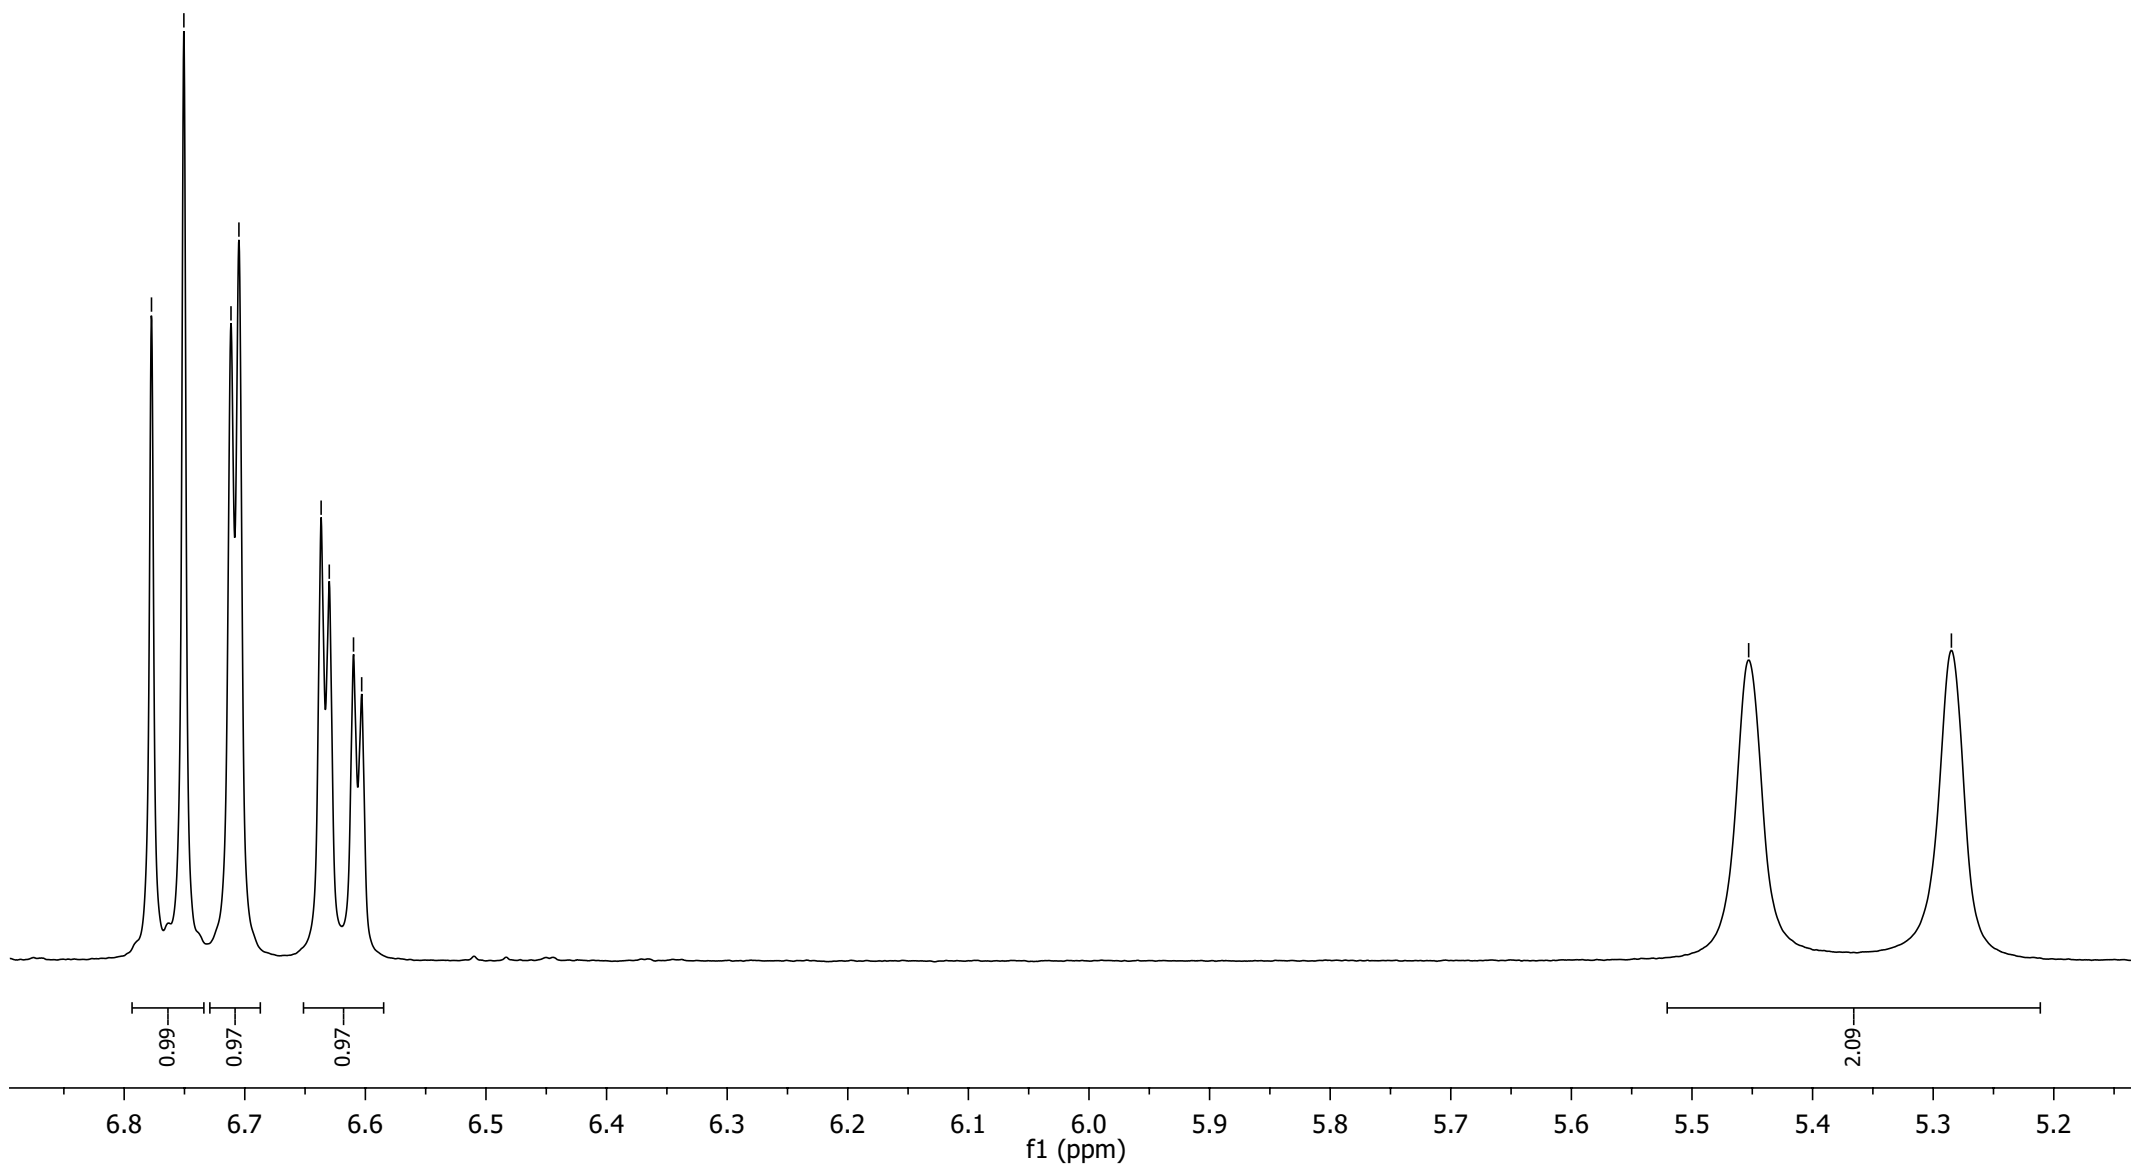

Supplement: s1 [file s1]

| Parameter | Value     |
|-----------|-----------|
| Comment   | 42094-13C |
|           | B1        |

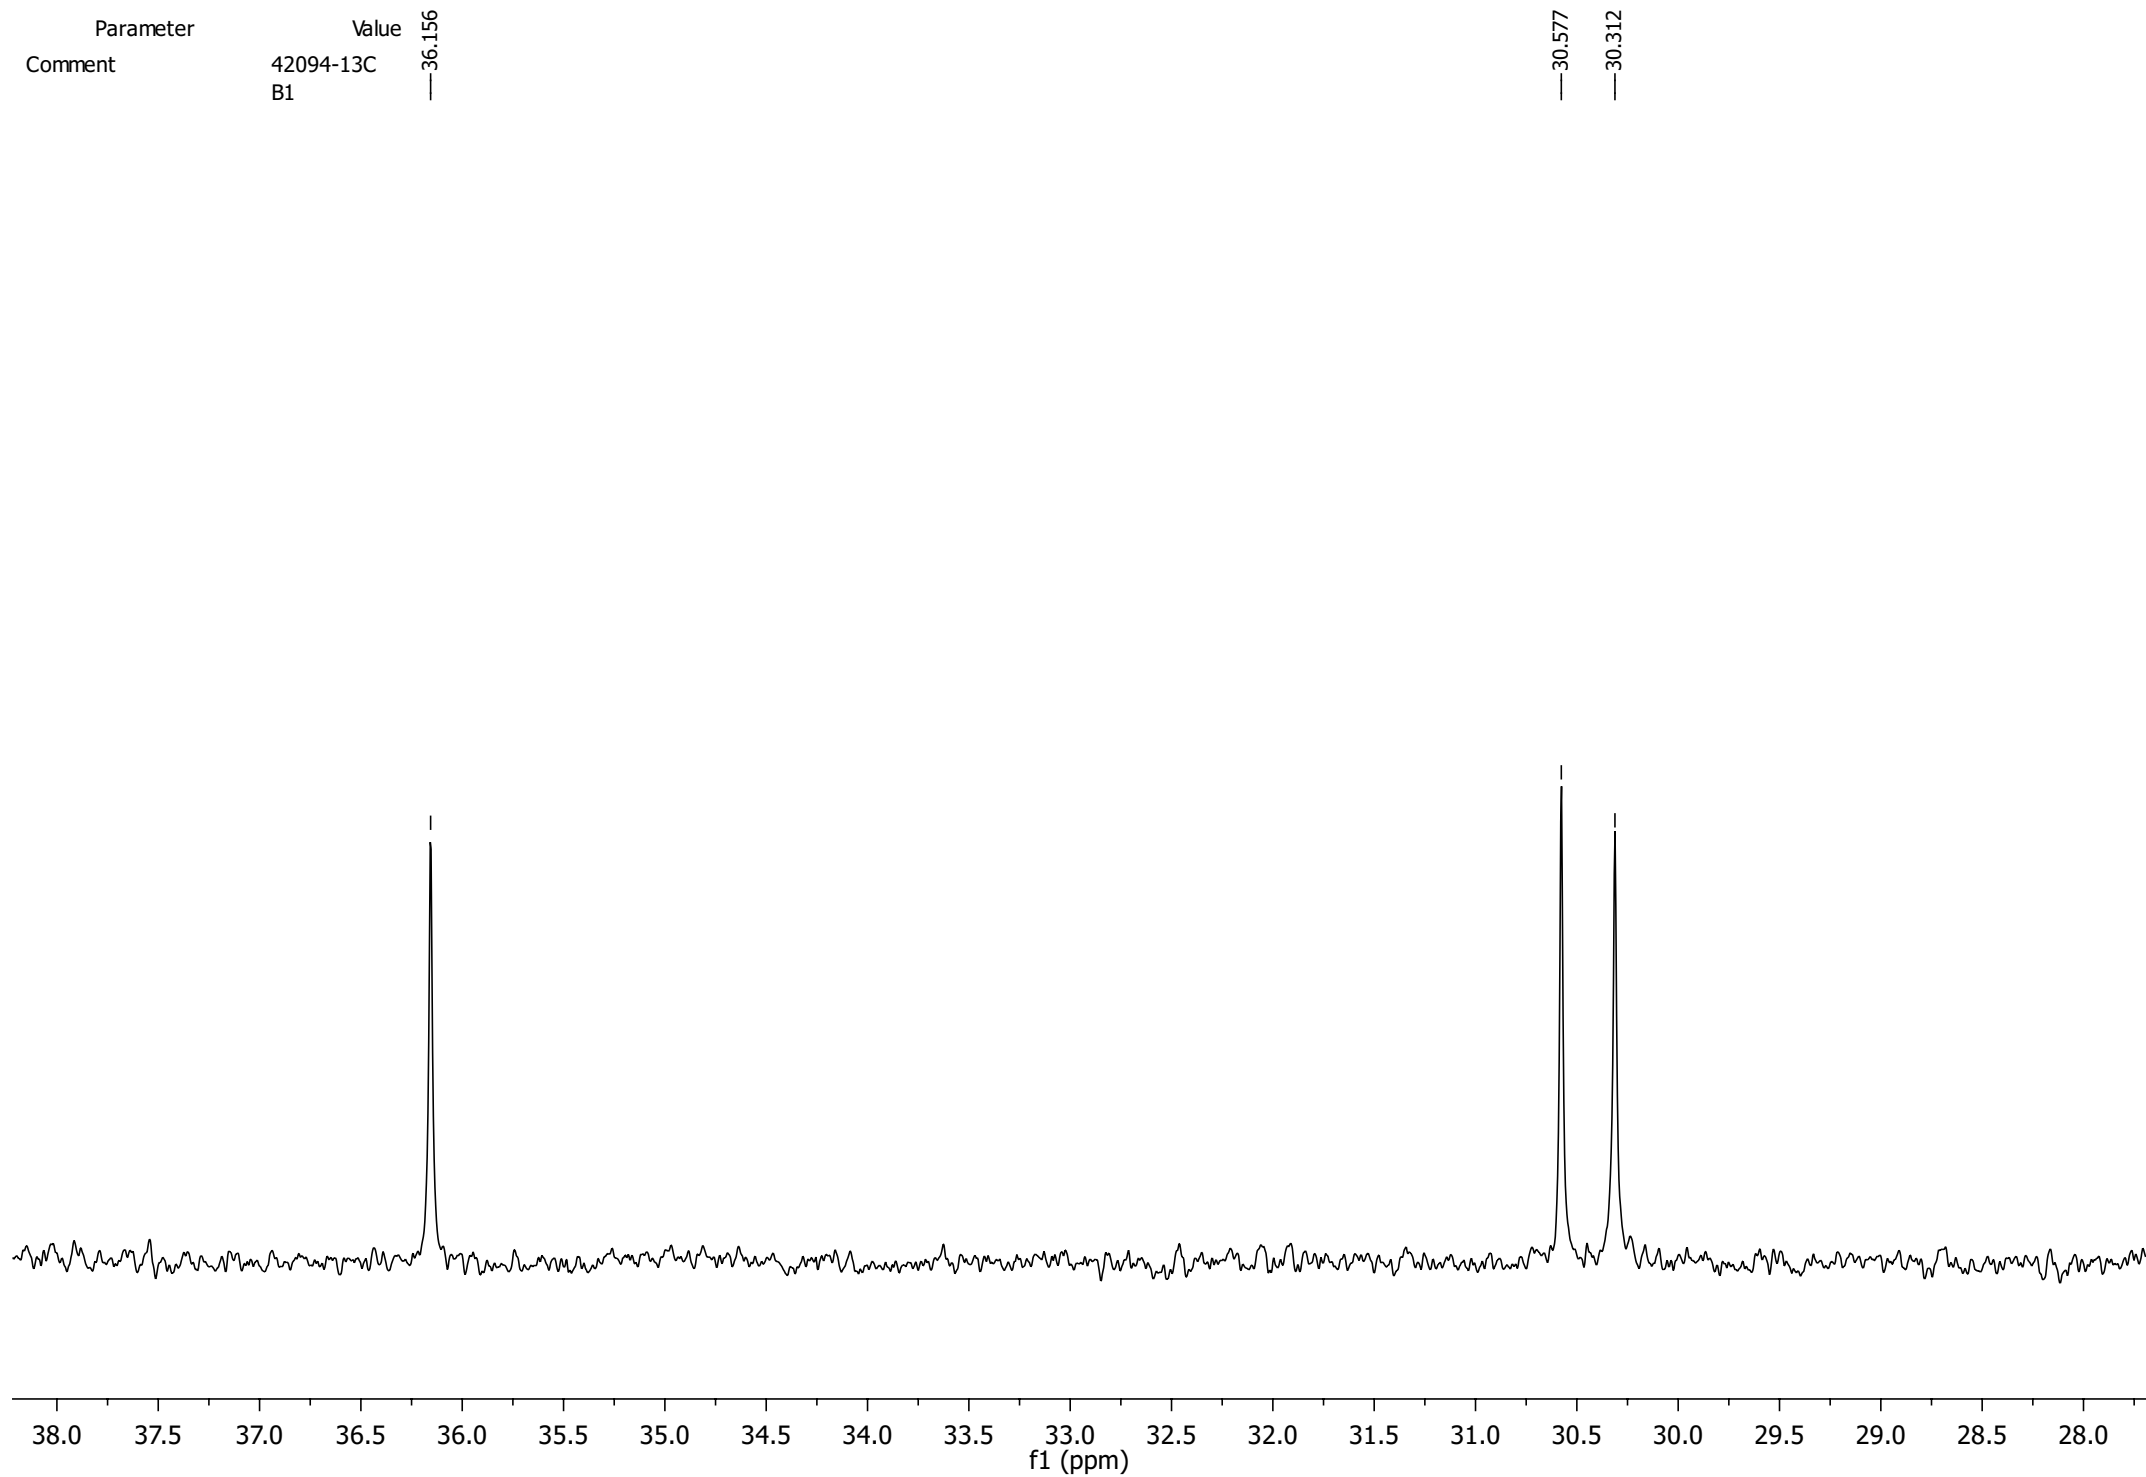

Supplement: s1 [file s1]

| Parameter | Value     |
|-----------|-----------|
| Comment   | 42094-13C |
|           | B1        |

—115.363  
—115.316

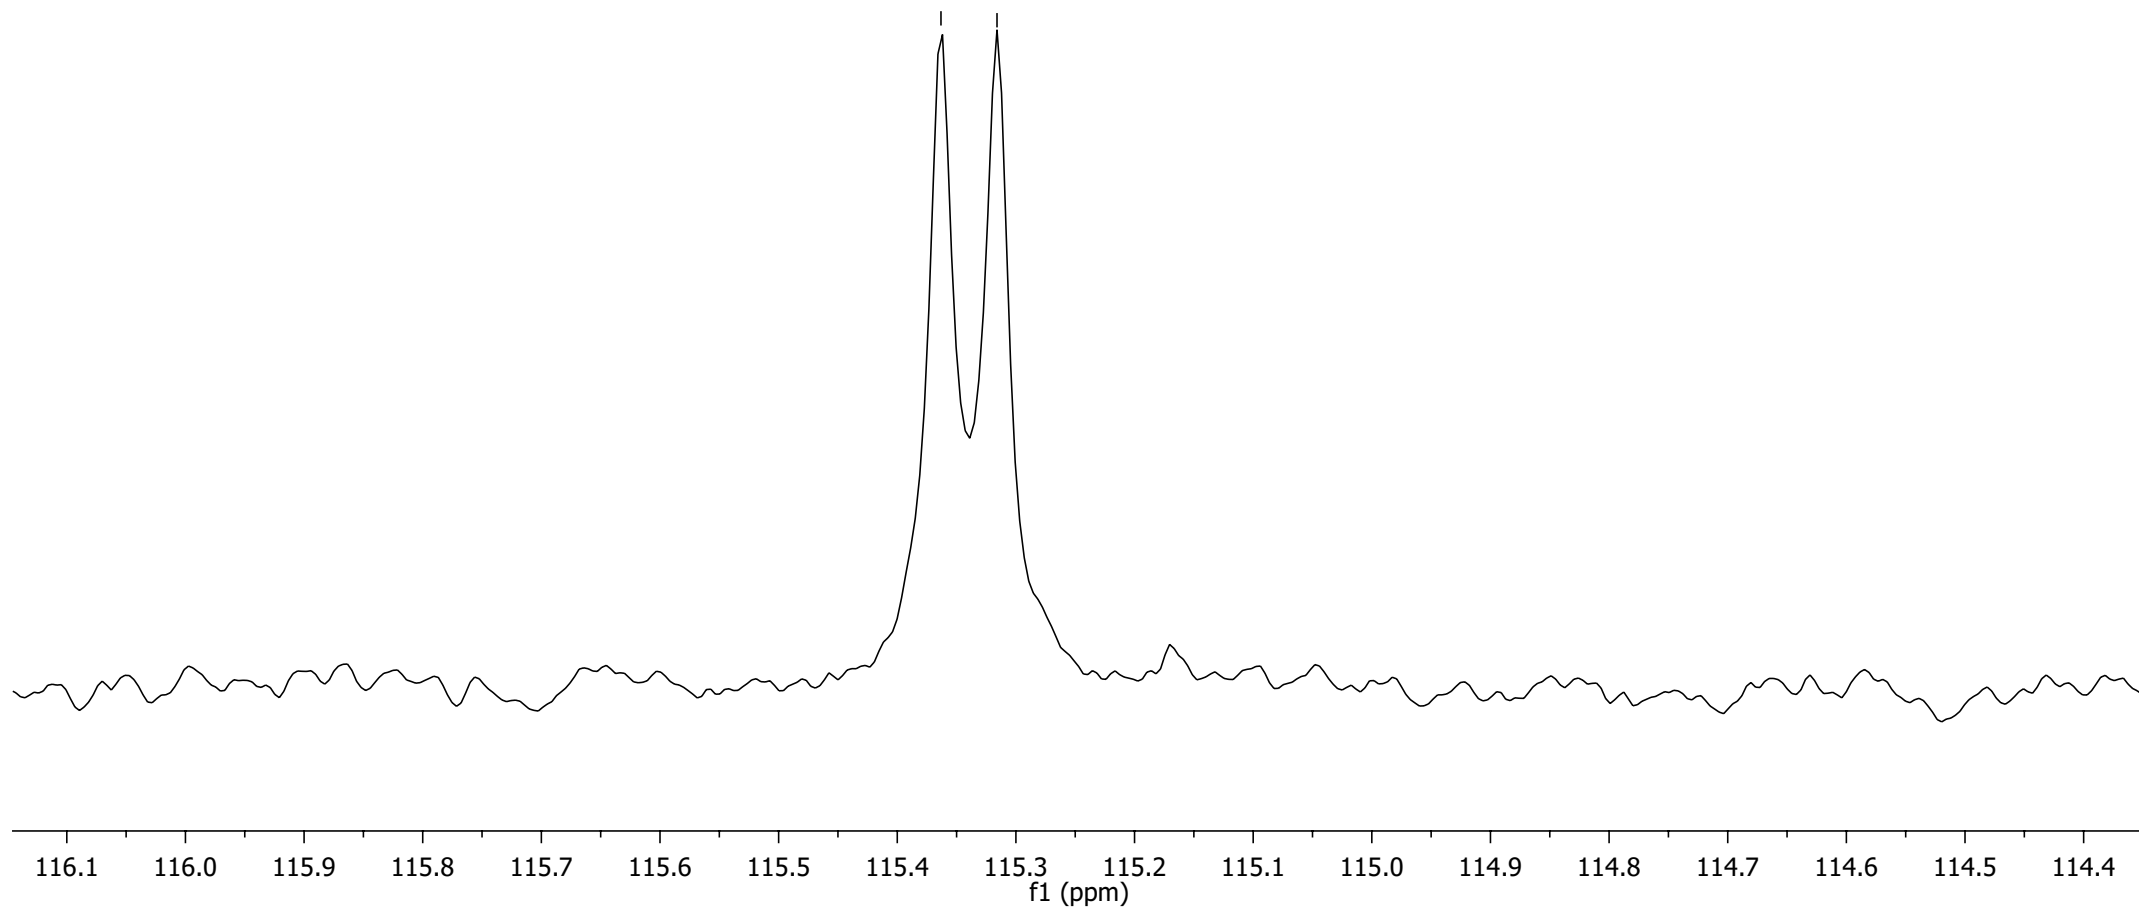

Supplement: s1 [file s1]
